# Supplementary material
Source: MDPI journal article supplement (https://www.mdpi.com/2073-4344/7/10/296)
Supplement: s1 [file s1]

# Supplementary Materials: Immobilization of Pyrroloquinoline Quinone-Dependent Alcohol Dehydrogenase with a Polyion Complex and Redox Polymer for a Bioanode

Yuki Sakurada <sup>1</sup>, Kouta Takeda <sup>1</sup>, Hiroyuki Ohno<sup>1</sup>, and Nobuhumi Nakamura <sup>1\*</sup>

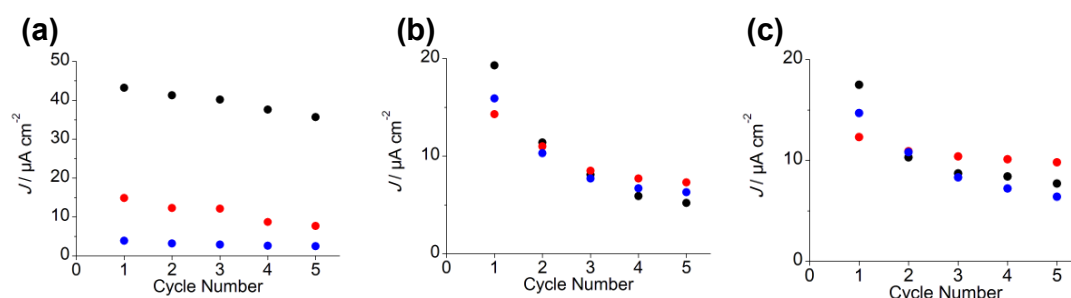

**Figure S1.** Stability of the *PpADH* modified electrodes with (a) PLL and anionic polymers: PGA (black), PSS (red), and PAA (blue), (b) PDDA and anionic polymers: PGA (black), PSS (red), and PAA (blue), and PAAM and anionic polymers: PGA (black), PSS (red), and PAA (blue). These results were obtained from CV measurements of *PpADH*-modified glassy carbon electrode in 50 mM CHES (pH=9.0) containing 30 mM ethylamine and 0.1 mM AmFc at a scan rate of  $10\text{ mV}\cdot\text{s}^{-1}$ .

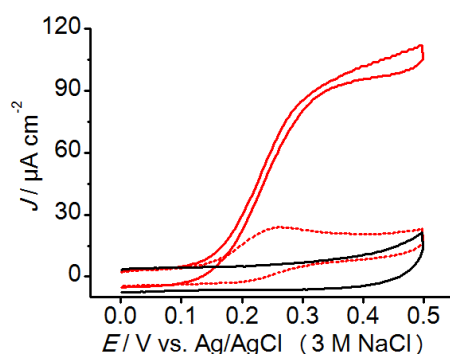

**Figure S2.** Cyclic voltammograms of the *PpADH* and PGA-AmFc-modified AuNPsE with 100 mM ethanol (red solid line) and without a substrate (red dotted line) and PGA and PLL modified AuNPs electrode with 100 mM ethanol (black solid line) in 50 mM CHES (pH=9.0) containing 30 mM ethylamine. The voltammograms were obtained at a scan rate of  $10\text{ mV}\cdot\text{s}^{-1}$ .
